# Supplementary material for: Feasibility of Quantification of Intracranial Aneurysm Pulsation with 4D CTA with Manual and Computer-Aided Post-Processing
Source: PLoS One. 2016 Nov 23;11(11):e0166810. doi: 10.1371/journal.pone.0166810 (PMC5120820; doi:10.1371/journal.pone.0166810)
Supplement: S4 Table — ROI measurements in a homogeneous region in aneurysm 1 in all time points for validation of the image noise for calculation of the random curves. (XLSX) [file pone.0166810.s004.xlsx]

## Sheet: Tabelle2
		1	2	3	4	5	6	7	8	9	10
	min	398	366	398	400	394	391	387	371	357	357
	max	461	464	476	473	468	469	478	465	442	475
	std	12	16	16	14	13	16	16	20	17	16
